# Supplementary material for: Nonfunctional ingestion of plant miRNAs in silkworm revealed by digital droplet PCR and transcriptome analysis
Source: PubMed Central journal article supplement (PMC4508662; doi:10.1038/srep12290), 2015-07-21
Supplement: srep12290-s1.pdf [file srep12290-s1.pdf]

**Nonfunctional ingestion of plant miRNAs in silkworm revealed by digital droplet  
PCR and transcriptome analysis**

Ling Jia <sup>1</sup>, Dayan Zhang <sup>1</sup>, Zhonghuia Xiang <sup>1</sup>, Ningjia He <sup>1,\*</sup>

<sup>1</sup>State Key Laboratory of Silkworm Genome Biology, Southwest University, Beibei, Chongqing  
400715, P. R. China

\*Corresponding author: Ningjia He

Tel: +86-23-6825-0797

Fax: +86-23-6825-1128

Email addresses: [hejia@swu.edu.cn](mailto:hejia@swu.edu.cn)

## Supplementary Tables and Figures

**Supplementary Table S1** TA-cloning and Sanger sequencing for mulberry miRNAs identified in silkworm tissues.

| miRNA name  | Fat body (C / T) |            | Silk gland (C / T) |            | Brain<br>(C / T) | Prothoracic<br>gland (C / T) | Salivary gland<br>(C / T) | Gut<br>(C / T) | Malpighian<br>tubule (C / T) | Ovary<br>(C / T) | Testis<br>C / T) |
|-------------|------------------|------------|--------------------|------------|------------------|------------------------------|---------------------------|----------------|------------------------------|------------------|------------------|
|             | 1st              | 2nd        | 1st                | 2nd        |                  |                              |                           |                |                              |                  |                  |
|             | sequencing       | sequencing | sequencing         | sequencing |                  |                              |                           |                |                              |                  |                  |
| mno-miR169a | 1/38             | 0/38       | 0/28               | 0/42       | 0/35             | 1/46                         | 0/35                      | 0/39           | 0/38                         | 1/43             | 0/45             |
| mno-miR166b | 15/73            | 32/42      | 42/74              | 22/37      | 22/41            | 13/41                        | 3/33                      | 3/35           | 4/37                         | 10/40            | 6/45             |
| mno-miR166c | 20/37            | 42/44      | 26/36              | 40/43      | 25/42            | 21/34                        | 5/24                      | 10/41          | 16/38                        | 14/44            | 12/32            |
| mno-miR167e | 5/40             | 1/44       | 5/37               | 1/43       | 10/39            | 4/41                         | 2/30                      | 3/37           | 8/40                         | 3/41             | 4/49             |
| mno-miR396b | 30/41            | 31/47      | 24/43              | 20/44      | 41/47            | 26/39                        | 14/38                     | 13/41          | 20/41                        | 15/44            | 11/49            |
| mno-miR159a | 0/40             | -          | 1/20               | -          | -                | -                            | -                         | -              | -                            | -                | -                |
| mno-miR156c | 1/12             | -          | 1/46               | -          | -                | -                            | -                         | -              | -                            | -                | -                |
| mno-miR398  | 0/49             | -          | 0/48               | -          | -                | -                            | -                         | -              | -                            | -                | -                |
| mno-miR162  | 0/42             | -          | 0/40               | -          | -                | -                            | -                         | -              | -                            | -                | -                |

C / T means correct clones / Total clones. “-” indicates that we did not clone the miRNA in the fat body, silk gland, brain, prothoracic gland, salivary gland, gut, malpighian tubule, ovary, and testis.

**Supplementary Table S2** The copy number counts of miR166b in silkworm hemolymph (Hem), fat body (FB), and silk gland (SL) before (0 h) and following ingesting synthetic miR166b (0.5 h, 3 h, 6 h, and 12 h).

| Sample    | miR166(counts/ $\mu$ l) |                      | Average value of miR166(counts/ $\mu$ l) |
|-----------|-------------------------|----------------------|------------------------------------------|
|           | 1 <sup>st</sup> well    | 2 <sup>nd</sup> well |                                          |
| Hem-0 h   | 22.5                    | 21.7                 | 22.1                                     |
| Hem-0.5 h | 562                     | 745                  | 653.5                                    |
| Hem-3 h   | 377                     | 456                  | 416.5                                    |
| Hem-6 h   | 28.9                    | 30.4                 | 29.65                                    |
| Hem-12 h  | 47.6                    | 59.8                 | 53.7                                     |
| FB-0 h    | 358                     | 381                  | 369.5                                    |
| FB-0.5 h  | 1160                    | 1100                 | 1130                                     |
| FB-3 h    | 511                     | 552                  | 531.5                                    |
| FB-6 h    | 206                     | 217                  | 211.5                                    |
| FB-12 h   | 140                     | 121                  | 130.5                                    |
| SL-0 h    | 192                     | 212                  | 202                                      |
| SL-0.5 h  | 162                     | 190                  | 176                                      |
| SL-3 h    | 114                     | 84                   | 99                                       |
| SL-6 h    | 114                     | 105                  | 109.5                                    |
| SL-12 h   | 109                     | 108                  | 108.5                                    |

**Supplementary Table S3** The predicted information for miR166b target genes.

| Potential target gene | Potential target gene annotation                                                                       | Gene in derived tissues <sup>1,*</sup> | Score | Energy (kcal/mol) | Length (nt) | Position start | Position end | Match condition                                                                                  |
|-----------------------|--------------------------------------------------------------------------------------------------------|----------------------------------------|-------|-------------------|-------------|----------------|--------------|--------------------------------------------------------------------------------------------------|
| <b>fner47P07</b>      | PREDICTED: similar to GA15241-PA [Tribolium castaneum]                                                 | nerve system + brain, larva            | 170   | -41.45            | 1258        | 305            | 327          | Query: 3' ccCCTT--ACTTCGGACCAGGct 5'<br>       :       <br>Ref: 5' ggGGAATGTGTGGCCTGGTCCGa 3'    |
| <b>fwd-23F03</b>      | PREDICTED: similar to Cpsf6 protein, partial [Strongylocentrotus purpuratus]                           | wing disc                              | 161   | -30.66            | 1273        | 827            | 850          | Query: 3' ccCCTTAC--TTCG-GACCAGGct 5'<br>         :      <br>Ref: 5' ggGGAATGCAAAGTGATGGTCCGc 3' |
| <b>fprW24O02</b>      | PREDICTED: probable phosphorylase b kinase regulatory subunit alpha-like isoform 2 [Bombus terrestris] | prothoracic gland, W-stage             | 164   | -29.99            | 5840        | 2633           | 2653         | Query: 3' cccctTACTTCGGACCAGGct 5'<br>: : : : : : : <br>Ref: 5' aagctGTGGGGTCTGGTCCGg 3'         |
| <b>fmxd11G04</b>      | PREDICTED: calcium-binding mitochondrial carrier protein Aralar1-like isoform 1 [Nasonia vitripennis]  | maxillary galea                        | 172   | -29.95            | 4344        | 1687           | 1708         | Query: 3' ccccTTACTT-CGGACCAGGct 5'<br> :          <br>Ref: 5' ccaaAGTGAAGCCTGGTCCGt 3'          |
| <b>fe8d35D03</b>      | GK17955 [Drosophila willistoni]                                                                        | embryo day 8                           | 157   | -28.73            | 5755        | 644            | 664          | Query: 3' ccccTTACTTCGGACCAGGct 5'<br> :        <br>Ref: 5' tgacAGGGCTGCCTGGTCCGg 3'             |

|                       |                                                                                     |                                           |     |        |      |      |      |                                                       |                                     |
|-----------------------|-------------------------------------------------------------------------------------|-------------------------------------------|-----|--------|------|------|------|-------------------------------------------------------|-------------------------------------|
| <b>fwgP16B11</b>      | olfactory receptor [Bombyx mori]                                                    | wing, pupa day 2-8                        | 158 | -27.79 | 5590 | 2091 | 2112 | Query: 3' ccCCTTAC-TTCGGACCAGGct 5'<br>       :  :    | Ref: 5' ggGGTATGTGGGATTGGTCCGc 3'   |
| <b>fufe34A12</b>      | PREDICTED:<br>PAP-associated domain-containing protein 5-like [Apis mellifera]      | unfertilized egg                          | 161 | -27.44 | 4400 | 337  | 360  | Query: 3' ccCCT-TACTTC--GGACCAGGct 5'<br>       :     | Ref: 5' acGGAGACGGAGCACCTGGTCCGc 3' |
| <b>NM_001043963.1</b> | Bombyx mori yellow-fb mRNA, complete cds.                                           | ovary/embryo o/fat body                   | 157 | -27.38 | 1516 | 996  | 1017 | Query: 3' ccccttaCTTCGG-ACCAGGct 5'<br> :             | Ref: 5' gtggttgGGAGCCGTGGTCCGc 3'   |
| <b>fwgP08C14</b>      | hook protein [Aedes aegypti]                                                        | wing, pupa day 2-8                        | 163 | -27.08 | 5275 | 4181 | 4199 | Query: 3' cccCTTACTTCGGACCAGGct 5'<br>     :          | Ref: 5' tctGAA--AGGCCTGGTCCGg 3'    |
| <b>fdpe24B10</b>      | REDICTED: similar to AGAP010191-PA [Tribolium castaneum]                            | diapaused egg                             | 155 | -26.85 | 2500 | 508  | 528  | Query: 3' ccCCTTACTTCGGACCAGGct 5'<br>      :  :      | Ref: 5' cgGGTCTGTGACTTGGTCCGa 3'    |
| <b>DQ311279</b>       | Bombyx mori double-stranded RNA-binding zinc finger protein JAZ mRNA, complete cds. | testis/head/integument/mid gut/silk gland | 160 | -26.71 | 1593 | 446  | 466  | Query: 3' ccCCTTACTTC--GGACCAGGct 5'<br>       :  : : | Ref: 5' tcGGAA-GAGGATTTGGTCCGg 3'   |

\* indicateds the genes from the derived tissues in the silkworm full-length cDNA libraries. Score and energy mean the parameters of miR166b with its target predicted by miranda software. Position start and position end indicate the positions of target gene matching to miR166b. Query and Ref mean the sequences of miR166b and their target genes.

**Supplementary Table S4** The expression level of 72 potential target genes for miR166b before and after silkworm ingested synthetic miR166b.

| GeneID                     | Gene Length | FED_control-Expression | FED_166b-Expression | FED_control-RPKM | FED_166b-RPKM | log2 Ratio(FED_166b/FED_control) | Up-Down-Regulation(FED_166b/FED_control) | P-value | FDR    |
|----------------------------|-------------|------------------------|---------------------|------------------|---------------|----------------------------------|------------------------------------------|---------|--------|
| DQ311279_KBtr3102131       | 1293        | 0                      | 8                   | 0.0010           | 0.2348        | 7.8750                           | Up                                       | 0.0042  | 0.0105 |
| fphe18H11_KBtr3008861      | 630         | 0                      | 4                   | 0.0010           | 0.2409        | 7.9123                           | Up                                       | 0.0652  | 0.1116 |
| fe8d35D03_KBtr3011035      | 2115        | 2                      | 6                   | 0.0365           | 0.1076        | 1.5601                           | Up                                       | 0.1883  | 0.2900 |
| NM_001046951.1_KBtr3103491 | 1821        | 2                      | 12                  | 0.0424           | 0.2500        | 2.5601                           | Up                                       | 0.0081  | 0.0190 |
| fmxcg11G04_KBtr3006016     | 1812        | 2                      | 6                   | 0.0426           | 0.1256        | 1.5601                           | Up                                       | 0.1883  | 0.2959 |
| e10025H07_KBtr3008407      | 1617        | 2                      | 2                   | 0.0477           | 0.0469        | -0.0248                          | Down                                     | 0.9839  | 0.9968 |
| fdpe27A10_KBtr3005579      | 801         | 1                      | 0                   | 0.0482           | 0.0010        | -5.5907                          | Down                                     | 0.4914  | 0.6103 |
| NM_001134242.1_KBtr3104129 | 1251        | 2                      | 0                   | 0.0617           | 0.0010        | -5.9475                          | Down                                     | 0.2436  | 0.3473 |
| MFB-22J01_KBtr3006608      | 1293        | 6                      | 4                   | 0.1791           | 0.1174        | -0.6098                          | Down                                     | 0.5296  | 0.6371 |
| fwgP08A16_KBtr3004462      | 2037        | 10                     | 17                  | 0.1895           | 0.3166        | 0.7407                           | Up                                       | 0.2006  | 0.3028 |
| NM_001135202.1_KBtr3104178 | 1734        | 12                     | 4                   | 0.2671           | 0.0875        | -1.6098                          | Down                                     | 0.0451  | 0.0868 |
| fufe05M06_KBtr3003435      | 2742        | 22                     | 27                  | 0.3097           | 0.3736        | 0.2706                           | Up                                       | 0.5187  | 0.6340 |
| fwgP08C14_KBtr3004464      | 4116        | 62                     | 50                  | 0.5815           | 0.4609        | -0.3352                          | Down                                     | 0.2222  | 0.3290 |
| fcaL50E18_KBtr3007892      | 1464        | 24                     | 22                  | 0.6328           | 0.5702        | -0.1504                          | Down                                     | 0.7259  | 0.8101 |
| ftes09J21_KBtr3002070      | 3774        | 67                     | 48                  | 0.6853           | 0.4826        | -0.5060                          | Down                                     | 0.0629  | 0.1127 |
| ftes01O21_KBtr3001806      | 3957        | 106                    | 110                 | 1.0340           | 1.0547        | 0.0286                           | Up                                       | 0.8852  | 0.9088 |
| fe8d26E10_KBtr3000564      | 966         | 26                     | 31                  | 1.0390           | 1.2176        | 0.2289                           | Up                                       | 0.5551  | 0.6476 |
| AB383140_KBtr3100772       | 738         | 20                     | 10                  | 1.0461           | 0.5141        | -1.0248                          | Down                                     | 0.0636  | 0.1113 |

|                              |      |     |     |        |        |          |      |        |        |
|------------------------------|------|-----|-----|--------|--------|----------|------|--------|--------|
| <b>ftes40N05_KBtr3003068</b> | 138  | 4   | 0   | 1.1189 | 0.0010 | -10.1278 | Down | 0.0599 | 0.1097 |
| <b>fner48F12_KBtr3001725</b> | 1995 | 63  | 59  | 1.2190 | 1.1221 | -0.1195  | Down | 0.6483 | 0.7341 |
| <b>fcaL46I03_KBtr3010924</b> | 1296 | 41  | 45  | 1.2212 | 1.3174 | 0.1095   | Up   | 0.7279 | 0.8007 |
| <b>bmmt22O18_KBtr3009956</b> | 885  | 29  | 22  | 1.2649 | 0.9432 | -0.4234  | Down | 0.3016 | 0.4148 |
| <b>fcaL26A22_KBtr3007341</b> | 183  | 6   | 3   | 1.2656 | 0.6220 | -1.0248  | Down | 0.3298 | 0.4455 |
| <b>ffbm37M15_KBtr3000868</b> | 3384 | 116 | 147 | 1.3232 | 1.6482 | 0.3168   | Up   | 0.0768 | 0.1285 |
| <b>fwgP16B11_KBtr3004585</b> | 219  | 8   | 5   | 1.4101 | 0.8663 | -0.7029  | Down | 0.4053 | 0.5201 |
| <b>EU073423_KBtr3101484</b>  | 3834 | 128 | 221 | 1.5433 | 2.6191 | 0.7631   | Up   | 0.0000 | 0.0000 |
| <b>fufe39C19_KBtr3004101</b> | 1521 | 67  | 80  | 1.6985 | 1.9934 | 0.2310   | Up   | 0.3351 | 0.6312 |
| <b>fprW23F16_KBtr3009502</b> | 2085 | 95  | 127 | 1.7588 | 2.3111 | 0.3940   | Up   | 0.0437 | 0.0885 |
| <b>fprW24O02_KBtr3009532</b> | 3675 | 178 | 185 | 1.8697 | 1.9100 | 0.0308   | Up   | 0.8396 | 0.8979 |
| <b>fmgV52F14_KBtr3001347</b> | 1233 | 62  | 70  | 1.9410 | 2.1541 | 0.1502   | Up   | 0.5525 | 0.6545 |
| <b>fufe34A12_KBtr3003983</b> | 1713 | 87  | 103 | 1.9605 | 2.2814 | 0.2187   | Up   | 0.2989 | 0.4185 |
| <b>fwd-23F03_KBtr3000242</b> | 589  | 30  | 29  | 1.9661 | 1.8681 | -0.0738  | Down | 0.8447 | 0.8789 |
| <b>fphe27I11_KBtr3009051</b> | 279  | 17  | 9   | 2.3520 | 1.2239 | -0.9424  | Down | 0.1116 | 0.1829 |
| <b>fner46B19_KBtr3001701</b> | 1737 | 112 | 128 | 2.4890 | 2.7960 | 0.1678   | Up   | 0.3698 | 0.4909 |
| <b>fphe06C05_KBtr3008553</b> | 1422 | 102 | 70  | 2.7689 | 1.8678 | -0.5680  | Down | 0.0107 | 0.0236 |
| <b>fprW16K18_KBtr3009416</b> | 1698 | 125 | 118 | 2.8417 | 2.6367 | -0.1080  | Down | 0.5601 | 0.6437 |
| <b>fufe11D11_KBtr3003523</b> | 5334 | 421 | 509 | 3.0467 | 3.6206 | 0.2490   | Up   | 0.0087 | 0.0197 |
| <b>fner44J23_KBtr3001686</b> | 1515 | 125 | 97  | 3.1849 | 2.4293 | -0.3907  | Down | 0.0449 | 0.0887 |
| <b>fcaL15I24_KBtr3007105</b> | 2349 | 199 | 246 | 3.2702 | 3.9735 | 0.2810   | Up   | 0.0408 | 0.0849 |
| <b>fphe05O06_KBtr3008545</b> | 1458 | 160 | 176 | 4.2361 | 4.5801 | 0.1127   | Up   | 0.4756 | 0.6004 |
| <b>fwgP14B05_KBtr3004550</b> | 855  | 105 | 110 | 4.7405 | 4.8814 | 0.0423   | Up   | 0.8310 | 0.9013 |
| <b>fdpe24B10_KBtr3005478</b> | 987  | 132 | 134 | 5.1625 | 5.1512 | -0.0032  | Down | 0.9853 | 0.9853 |
| <b>fdpe20E17_KBtr3005343</b> | 3027 | 485 | 467 | 6.1849 | 5.8536 | -0.0794  | Down | 0.3959 | 0.5167 |
| <b>fcaL11N10_KBtr3007021</b> | 192  | 33  | 23  | 6.6346 | 4.5451 | -0.5457  | Down | 0.1642 | 0.2634 |

|                                   |      |      |      |          |          |         |      |        |        |
|-----------------------------------|------|------|------|----------|----------|---------|------|--------|--------|
| <b>AB177622_KBtr3102492</b>       | 2160 | 408  | 406  | 7.2833   | 7.1238   | -0.0319 | Down | 0.7520 | 0.8880 |
| <b>fufe21M15_KBtr3003731</b>      | 258  | 52   | 41   | 7.7801   | 6.0296   | -0.3677 | Down | 0.2230 | 0.3240 |
| <b>e10013A10_KBtr3008211</b>      | 2379 | 523  | 628  | 8.4861   | 10.0158  | 0.2391  | Up   | 0.0051 | 0.0122 |
| <b>e10004B12_KBtr3008032</b>      | 1662 | 1010 | 1131 | 23.4580  | 25.8198  | 0.1384  | Up   | 0.0267 | 0.0570 |
| <b>fnr47P07_KBtr3001722</b>       | 1032 | 1112 | 1235 | 41.5474  | 45.3551  | 0.1265  | Up   | 0.0339 | 0.1887 |
| <b>fphe05E06_KBtr3008533</b>      | 489  | 653  | 657  | 51.5473  | 50.9774  | -0.0160 | Down | 0.8404 | 0.8864 |
| <b>MFB-15M01_KBtr3006466</b>      | 1884 | 4735 | 4624 | 97.0153  | 93.1232  | -0.0591 | Down | 0.0476 | 0.0895 |
| <b>fphe22F14_KBtr3008946</b>      | 909  | 3795 | 3811 | 160.9781 | 158.8964 | -0.0188 | Down | 0.5703 | 0.7876 |
| <b>AB064522_KBtr3102562</b>       | 396  | 0    | 0    | -        | -        | -       | -    | -      | -      |
| <b>AB196705_KBtr3101600</b>       | 738  | 0    | 0    | -        | -        | -       | -    | -      | -      |
| <b>AB330437_KBtr3101259</b>       | 1251 | 0    | 0    | -        | -        | -       | -    | -      | -      |
| <b>AB425069_KBtr3100742</b>       | 1734 | 0    | 0    | -        | -        | -       | -    | -      | -      |
| <b>DQ358082_KBtr3101752</b>       | 1257 | 0    | 0    | -        | -        | -       | -    | -      | -      |
| <b>DQ443256_KBtr3101964</b>       | 1821 | 0    | 0    | -        | -        | -       | -    | -      | -      |
| <b>fphe15F13_KBtr3011069</b>      | 1293 | 0    | 0    | -        | -        | -       | -    | -      | -      |
| <b>ftes24P18_KBtr3002516</b>      | 270  | 0    | 0    | -        | -        | -       | -    | -      | -      |
| <b>ftes49O09_KBtr3003295</b>      | 2166 | 0    | 0    | -        | -        | -       | -    | -      | -      |
| <b>GU322819_KBtr3100270</b>       | 909  | 0    | 0    | -        | -        | -       | -    | -      | -      |
| <b>MFB-15M07_KBtr3006467</b>      | 396  | 0    | 0    | -        | -        | -       | -    | -      | -      |
| <b>NM_001043418.1_KBtr3102696</b> | 396  | 0    | 0    | -        | -        | -       | -    | -      | -      |
| <b>NM_001043453.1_KBtr3102731</b> | 2160 | 0    | 0    | -        | -        | -       | -    | -      | -      |
| <b>NM_001043521.1_KBtr3102794</b> | 738  | 0    | 0    | -        | -        | -       | -    | -      | -      |
| <b>NM_001043963.1_KBtr3103046</b> | 1257 | 0    | 0    | -        | -        | -       | -    | -      | -      |
| <b>NM_001046730.1_KBtr3103271</b> | 1293 | 0    | 0    | -        | -        | -       | -    | -      | -      |
| <b>NM_001110342.1_KBtr3103872</b> | 3834 | 0    | 0    | -        | -        | -       | -    | -      | -      |
| <b>NM_001172724.1_KBtr3104383</b> | 909  | 0    | 0    | -        | -        | -       | -    | -      | -      |



|                              |      |   |   |   |   |   |   |   |   |
|------------------------------|------|---|---|---|---|---|---|---|---|
| <b>fe8d22B10_KBtr3000534</b> | 435  | 0 | 0 | - | - | - | - | - | - |
| <b>ftes10A11_KBtr3002088</b> | 4407 | 0 | 0 | - | - | - | - | - | - |

Gene expression levels (reads per kb per million reads, RPKM) were determined prior to feeding (FED-control) or after feeding of synthetic miR166b (FED-miR166b).

**Supplementary Table S5** Primers for stem-loop PCR of miRNAs.

| miRNA name         | Sequence (5'-3')      | Reverse transcriptive primer                       | Forword primer (5'-3')  | Reverse primer(5'-3') |
|--------------------|-----------------------|----------------------------------------------------|-------------------------|-----------------------|
| <b>mno-miR166c</b> | TCTCGGACCAGGCTTCATTCC | GTCGTATCCAGTGCAGGGTCCGAGGTATTCGCACTGGATACGACggaatg | GGCGTCTCGGACCAGGCT      | CAGTGCAGGGTCCGAGGTAT  |
| <b>mno-miR167e</b> | TGAAGCTGCCAGCATGATCTG | GTCGTATCCAGTGCAGGGTCCGAGGTATTCGCACTGGATACGACcagatc | TCGAGAGTGAAGCTGCCAGC    | CAGTGCAGGGTCCGAGGTAT  |
| <b>mno-miR156c</b> | TTGACAGAAGATAGAGAGCAC | GTCGTATCCAGTGCAGGGTCCGAGGTATTCGCACTGGATACGACgtgctc | GCCGAGGAGATTGACAGAAGATA | CAGTGCAGGGTCCGAGGTAT  |
| <b>mno-miR398</b>  | TGTGTTCTCAGGTCGCCCTG  | GTCGTATCCAGTGCAGGGTCCGAGGTATTCGCACTGGATACGACcagggg | CCGAGGAGATGTGTTCTCAGGT  | CAGTGCAGGGTCCGAGGTAT  |
| <b>mno-miR166b</b> | TCGGACCAGGCTTCATTCCCC | GTCGTATCCAGTGCAGGGTCCGAGGTATTCGCACTGGATACGACggggaa | CGAGTTCGGACCAGGCTTCA    | CAGTGCAGGGTCCGAGGTAT  |
| <b>mno-miR159a</b> | TTTGGATTGAAGGGAGCTCTG | GTCGTATCCAGTGCAGGGTCCGAGGTATTCGCACTGGATACGACcagagc | CGAGAGTTTGGATTGAAGGGA   | CAGTGCAGGGTCCGAGGTAT  |
| <b>mno-miR162</b>  | TCGATAAACCTCTGCATCCAG | GTCGTATCCAGTGCAGGGTCCGAGGTATTCGCACTGGATACGACctggat | CGAGGAGATCGATAAACCTCTGC | CAGTGCAGGGTCCGAGGTAT  |
| <b>mno-miR396b</b> | TTCCACAGCTTTCTTGAAGT  | GTCGTATCCAGTGCAGGGTCCGAGGTATTCGCACTGGATACGACcagttc | GCAGCAGTCCACAGCTTTCTT   | CAGTGCAGGGTCCGAGGTAT  |
| <b>mno-miR535</b>  | TGACAACGAGAGAGAGCACGC | GTCGTATCCAGTGCAGGGTCCGAGGTATTCGCACTGGATACGACgcgtgc | GCGAGTGTGACAACGAGAGAGA  | CAGTGCAGGGTCCGAGGTAT  |
| <b>mno-miR172a</b> | AGAATCTTGATGATGCTGCAT | GTCGTATCCAGTGCAGGGTCCGAGGTATTCGCACTGGATACGACatgcag | GCACGCAGAGAATCTTGATGATG | CAGTGCAGGGTCCGAGGTAT  |
| <b>mno-miR168b</b> | TCGCTTGGTGCAGGTCGGGAA | GTCGTATCCAGTGCAGGGTCCGAGGTATTCGCACTGGATACGACttcccg | CGAGTTCGCTTGGTGCAGGT    | CAGTGCAGGGTCCGAGGTAT  |
| <b>mno-miR169a</b> | CAGCCAAGGATGACTTGCCGG | GTCGTATCCAGTGCAGGGTCCGAGGTATTCGCACTGGATACGACccggca | CAGGAGACAGCCAAGGATGACT  | CAGTGCAGGGTCCGAGGTAT  |

**Supplementary Table S6** Primers for RT-PCR of miR166b potential target genes and immunity-relatively genes.

| <b>Gene name</b>                        | <b>Forward Primer (5' to 3')</b> | <b>Reversed Primer (5' to 3')</b> |
|-----------------------------------------|----------------------------------|-----------------------------------|
| <b>fwgP08C14</b>                        | TACACCGATAAAAGAGAACCCGA          | CGTGTCTTGCTTCATTTCTATCTTG         |
| <b>fwgP16B11</b>                        | ATTCCAGTGCCCATTAATCGTCA          | AGGATGCTAAAATATCCATGGATCC         |
| <b>fe8d35D03</b>                        | GGCTCTGAACCACCCACG               | GCCACAGACTATCCAATAATCG            |
| <b>fmng11G04</b>                        | GGGCGGTTCTCAAGTGGTGT             | GGAAGTATATGGCGCTGAAGGGC           |
| <b>fufe34A12</b>                        | TGGCGAATACCTAATTATGCGT           | CAGTACGGAATGAACCGAACAC            |
| <b>fdpe24B10</b>                        | CTATCCAGAGAAGAGGCAGAAGAA         | GACCACATCGCTTTCTCTTCTTG           |
| <b>NM_001043963.1</b>                   | TGTCGACTCACGAGTACGCCA            | CTCCTCGACGAGCGGTTTCT              |
| <b>fwd-23F03</b>                        | CACCTGGGCTGAGACCACCTA            | TCCTGGCGGACCATCACTTT              |
| <b>fprW24O02</b>                        | ACGGTAAGGTGGCGACAGTG             | AATCAGTAACGGCTTTAGCGAGA           |
| <b>fnr47P07</b>                         | GGGATAAAATGCAGCGTCGAGTAGT        | TGGCGGTGCTTGACCCTTTG              |
| <b>DQ311279</b>                         | ATCCACCAAGACCCCCTCC              | AGGAATGTTTTTCAAACCTGTCCTT         |
| <b>Bm_nscaf1071_24</b>                  | TGTTTCGCTATTGTTTTTCGCC           | CTTTTGCTTTTGCCAAGGTGT             |
| <b>Bm_nscaf2556_13</b>                  | TACTCGGCCGGGGTAAG                | ACATTGGGCTCCCACGAAGAT             |
| <b>Bm_nscaf2814_10</b>                  | GTGTGACCAACAACCTGTGAGCCC         | TACGGAAAATGCGAATGGACGA            |
| <b>Bm_nscaf2818_080</b>                 | TATTGTATTGTTGTTTGTGTGGCA         | GGTCGCAGAAGCACTGTGGAAC            |
| <b>Bm_nscaf3050_1</b>                   | GCAGGTGCTATCAACTCTCCTCAAT        | TAAAGGTAATGGAGATTTCAAAGGA         |
| <b>Bm_nscaf2970_047</b>                 | CTATGGTAGCGTCCAAGGAGAGA          | CTCTTTCGAACTCCTCACGTAGC           |
| <b>Translation initiation factor 4A</b> | TTCGTA CTGGCTCTTCTCGT            | CAAAGTTGATAGCAATTCCT              |

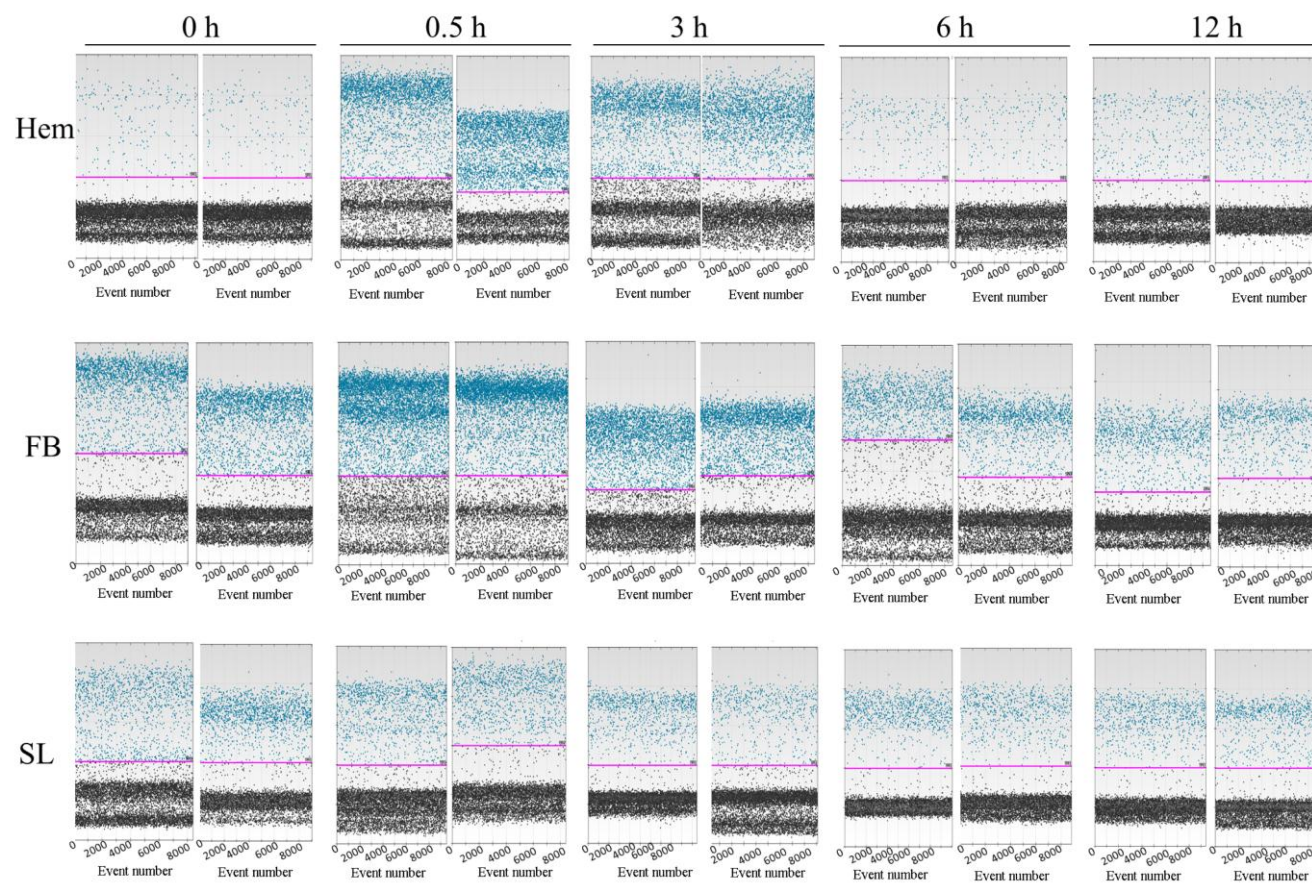

**Supplementary Figure S1** Droplet digital PCR indicates the synthetic miR166b entered into the silkworm hemolymph, fat body, but not into silk gland after application of oral synthetic miR166b. The Y axis represents the signal intensity. The X axis represents the droplet numbers for a 20  $\mu$ l PCR reaction divided by QX100 droplet generator. Hem: Hemolymph, FB: fat body, SL: silk gland. The purple line below represents the signals of NTC (no template control).

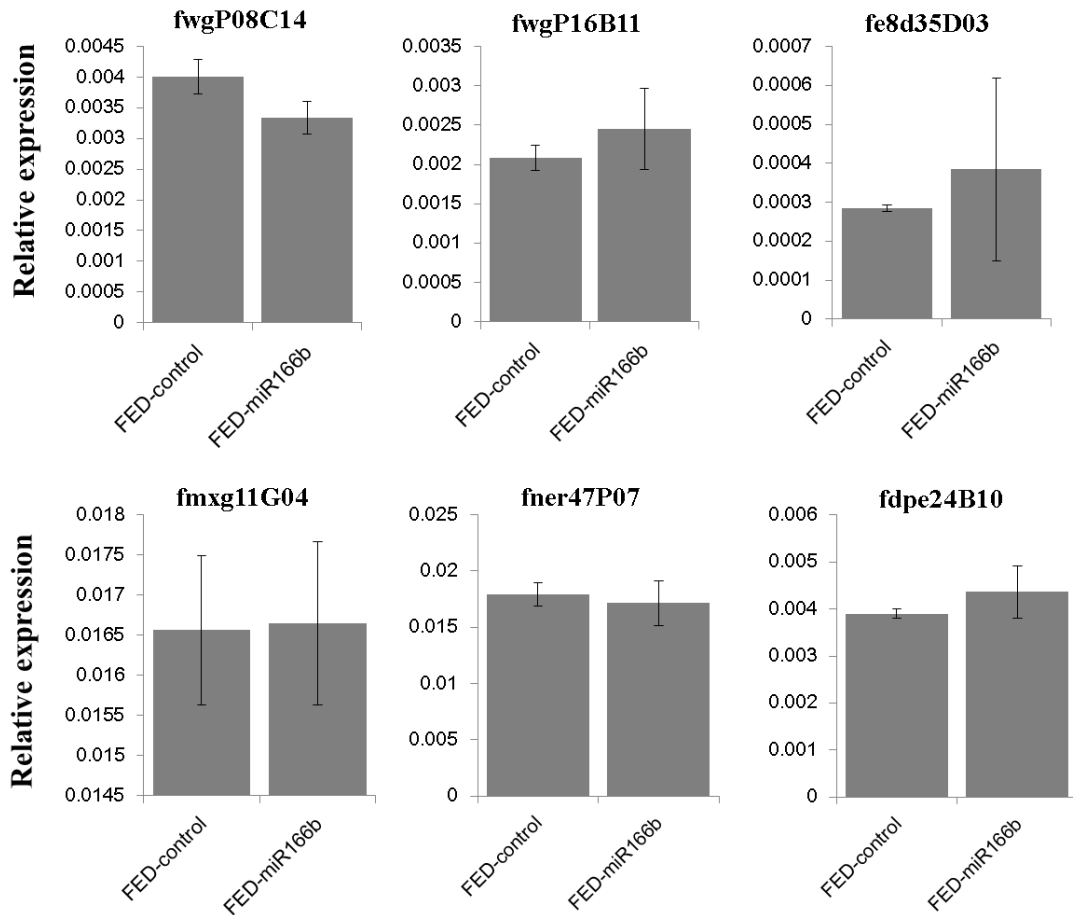

**Supplementary Figure S2** The expression levels of 6 potential miR166b target genes in fat body before and after silkworm larvae ingested synthetic miR166b. FED-control represents the silkworm larvae were only fed on mulberry leaves. FED-miR166b means the silkworm larvae were fed on a piece of mulberry leaf containing synthetic miR166b. Statistical significance was determined by Student's t test (\*,  $p < 0.05$ ).

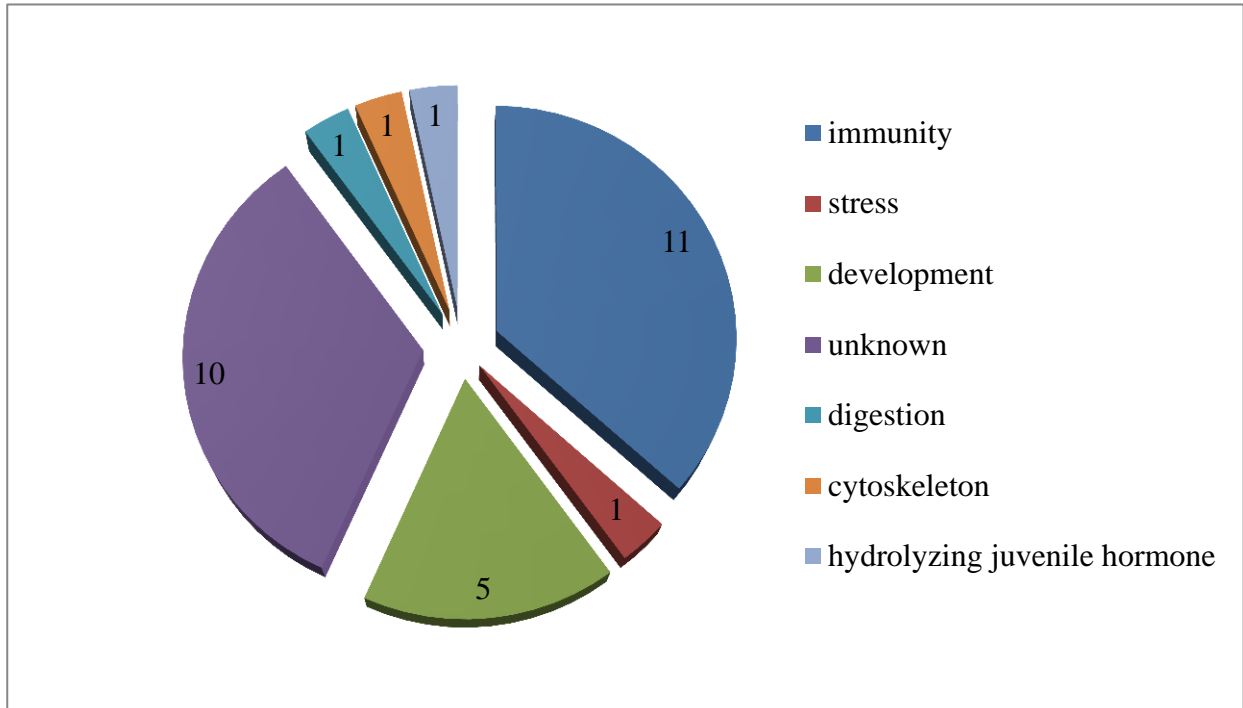

**Supplementary Figure S3** Categorization of 30 differentially expression genes before and after ingestion synthetic miR166b by silkworm. The values indicate the gene numbers in each category.

### References

1. Suetsugu ,Y. et al. Large scale full-length cDNA sequencing reveals a unique genomic landscape in a lepidopteran model insect, *Bombyx mori*. *G3 (Bethesda)* **3**, 1481-1492 (2013).
